# Supplementary material for: A dual functional fluorogenic probe for visualization of intracellular pH and formaldehyde with distinct fluorescence signals
Source: Royal Society of Chemistry journal article supplement (doi:10.1039/c8ob00989a), 2018-01-01

## Supporting Information

### **A dual functional fluorogenic probe for visualization of intracellular pH and formaldehyde with distinct fluorescence signals**

Zhenda Xie,<sup>a</sup> Biao Yin,<sup>a</sup> Jiajie Shen,<sup>b</sup> Danqi Hong,<sup>a</sup> Liquan Zhu,<sup>a</sup> Jingyan Ge<sup>a</sup> and Qing  
Zhu<sup>\*a</sup>

<sup>a</sup>Key Laboratory of Bioorganic Synthesis of Zhejiang Province, College of Biotechnology and Bioengineering, Zhejiang University of Technology, Chaowang Road 18, Hangzhou 310014, China. E-mail addresses: [zhug@zjut.edu.cn](mailto:zhug@zjut.edu.cn).

<sup>b</sup>Key Laboratory of Women's Reproductive Health of Zhejiang Province, Women's Hospital School of Medicine Zhejiang University, Xueshi Road 1, Hangzhou 310006, China.

## 1. Materials and methods

All chemicals were commercially available and used without further purification.  $^1\text{H}$  NMR and  $^{13}\text{C}$  NMR spectra were recorded on Bruker Avance 500 MHz spectrometers. The spectra were reported in ppm ( $\delta$ ) and referenced to a tetramethylsilane (TMS) standard in  $\text{CDCl}_3\text{-d}_1$ ,  $\text{DMSO-d}_6$ . Thin layer chromatography (TLC) for reaction monitoring was performed on pre-coated silica gel plates (Merck 60 F254 nm) with fluorescent indicator UV254, and the column chromatography was conducted over silica gel (mesh 300-400). The fluorescence and UV-vis spectra were acquired on a SpectraMax M5, Molecular Devices. HPLC was carried out on Thermo Fisher UltiMate 3000 systems equipped with an autosampler, using reverse-phase Phenomenex Luna 5  $\mu\text{m}$  C18 100 Å  $50 \times 3.0$  mm columns, and the flow rate was 0.5 mL/min. The elution method is 8 min 2%-100% ACN, 5 min 100%-2% ACN, in total 13 min. Mass spectra were recorded on a Thermo Fisher LTQ XL spectrometer.

## 2. MTT assay

To confirm that the toxicity of probe **DPFP**, the viability of HeLa cells in our incubation condition were carried out. HeLa cells ( $1 \times 10^5$  cells per well) were incubated with probe **DPFP** with concentrations (2, 5, 10, 20 and 30  $\mu\text{M}$ , respectively) for 24 h. Subsequently, 50  $\mu\text{L}$  MTT was added into each well, and the cells were incubated for 4 h at 37 °C under 5%  $\text{CO}_2$ . Then the medium was removed and DMSO (150  $\mu\text{L}$ ) was added to each well. OD values were detected at 550 nm.

## 3. Cell culture and fluorescence imaging for cellular pH

Fresh stock of HeLa cells were cultured in Dulbecco's modified Eagle's medium (DMEM) supplemented with 10% fetal bovine serum and appropriate amounts of antibiotics (penicillin and streptomycin). Approximately  $1 \times 10^5$  cells were seeded in a confocal dish (20 mm) with 1 mL of medium at 37 °C. Before probe **DPFP** was added, the cells to be tested were allowed to adhere to the dish for 24 h. They were then incubated with probe **DPFP** (10  $\mu\text{M}$ ) at 37 °C for 30 min and washed with fresh medium. Then the medium was replaced with fresh medium containing Lyso-Tracker Red and incubated for 20 min. After that, cells were washed with PBS twice for

confocal imaging using Olympus Fluoview FV 1200 confocal fluorescence microscopy.

#### **4. Cell imaging for exogenous FA**

Fresh stock of HeLa cells were cultured in Dulbecco's modified Eagle's medium (DMEM) supplemented with 10% fetal bovine serum and appropriate amounts of antibiotics (penicillin and streptomycin). Approximately  $1 \times 10^5$  cells were seeded in a confocal dish (20 mm) with 1 mL of medium at 37 °C. Subsequently, they were then incubated with probe **DPFP** (10  $\mu$ M) at 37 °C for 30 min and washed with fresh medium. Then FA (0.3, 0.6, 1, 2 mM) was added for another 3 h incubation. After that, cells were washed with PBS twice for confocal imaging.

#### **5. Cell imaging for endogenous FA**

Fresh stock of HeLa cells was seeded into a confocal dish with a density of  $1 \times 10^5$  cells per dish, and incubated for 24 h. Subsequently, they were then incubated with inhibitor (NAC or NaHSO<sub>3</sub>) for 30 min and washed with fresh medium. Then probe **DPFP** was added for another 3 h incubation. After that, cells were washed with PBS twice for confocal imaging.

#### **6. Cell imaging for endogenous pH and FA simultaneously**

Fresh stock of HeLa cells was seeded into a confocal dish with a density of  $1 \times 10^5$  cells per dish, and incubated for 24 h. Subsequently, they were incubated with probe **DPFP** (10  $\mu$ M) at 37 °C for 30 min and washed with fresh medium. After 3 h, cells were washed with PBS twice for confocal imaging.

## Synthesis

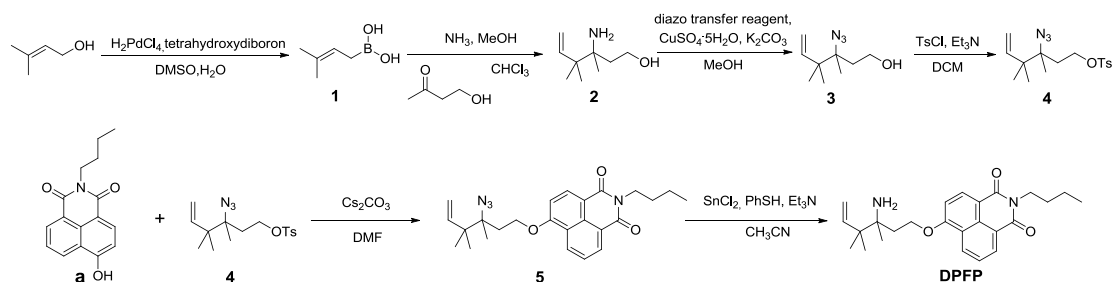

**Scheme S1** Synthesis of probe **DPFP**

Compound **4** and compound **a** were prepared following the reported procedures.<sup>1,2</sup>

Compound **4**: <sup>1</sup>H NMR (500 MHz, CDCl<sub>3</sub>) δ 7.78 (d, *J* = 8.3 Hz, 2H), 7.34 (d, *J* = 8.1 Hz, 2H), 5.85 (dd, *J* = 17.5, 10.9 Hz, 1H), 5.02 (ddd, *J* = 18.5, 14.2, 1.1 Hz, 2H), 4.19 – 4.08 (m, 2H), 2.43 (s, 3H), 1.86 (s, 1H), 1.78 (dd, *J* = 14.5, 7.3 Hz, 1H), 1.25 (s, 3H), 1.00 (d, *J* = 2.1 Hz, 6H). <sup>13</sup>C NMR (126 MHz, CDCl<sub>3</sub>) δ 144.80, 143.13, 132.77, 129.77, 127.73, 113.98, 67.26, 66.64, 45.37, 34.50, 22.08, 21.89, 21.44, 17.57. C<sub>16</sub>H<sub>23</sub>N<sub>3</sub>O<sub>3</sub>S (M + H) 337.1, found 337.2.

Compound **a**: <sup>1</sup>H NMR (500 MHz, DMSO) δ 8.43 (dd, *J* = 8.3, 0.8 Hz, 1H), 8.40 – 8.33 (m, 1H), 8.26 (d, *J* = 8.2 Hz, 1H), 7.71 – 7.62 (m, 1H), 7.09 (d, *J* = 8.2 Hz, 1H), 4.00 – 3.91 (m, 2H), 1.62 – 1.47 (m, 2H), 1.38 – 1.25 (m, 2H), 0.90 (t, *J* = 7.4 Hz, 3H). <sup>13</sup>C NMR (126 MHz, DMSO) δ 163.54, 162.88, 160.19, 133.36, 130.92, 129.05, 128.72, 125.37, 122.28, 121.68, 112.49, 109.86, 39.04, 29.71, 19.81, 13.68. C<sub>16</sub>H<sub>15</sub>NO<sub>3</sub> (M + H) 270.3, found 270.2.

### Preparation and Characterization of Compound 5

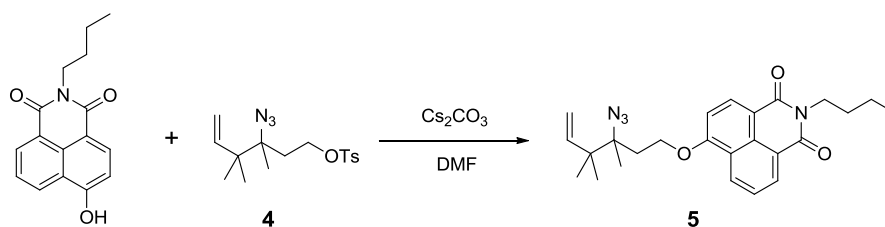

To a solution of compound **a** (0.65 g, 2.4 mmol) and Cs<sub>2</sub>CO<sub>3</sub> (0.78 g, 2.4 mmol) in dry DMF, compound **4** (0.67, 2 mmol) was added dropwise, and the mixture was stirred under N<sub>2</sub> at 40 °C overnight. The solvent was removed under high vacuum, and the resulting residue was purified

by silica column chromatography using EtOAc/PE (v/v, 1:10) to afford a pale yellow solid compound **5** (yield 30%).  $^1\text{H}$  NMR (500 MHz,  $\text{CDCl}_3$ )  $\delta$  8.50 – 8.34 (m, 3H), 7.59 (dd,  $J = 8.3, 7.4$  Hz, 1H), 6.94 (d,  $J = 8.3$  Hz, 1H), 6.00 (dd,  $J = 17.5, 10.9$  Hz, 1H), 5.20 – 5.03 (m, 2H), 4.34 (t,  $J = 6.7$  Hz, 2H), 4.17 – 4.02 (m, 2H), 2.22 (dd,  $J = 13.8, 6.9$  Hz, 1H), 2.10 (dt,  $J = 14.2, 7.0$  Hz, 1H), 1.67 (tt,  $J = 7.7, 6.6$  Hz, 2H), 1.45 (s, 3H), 1.41 (dt,  $J = 14.2, 7.2$  Hz, 2H), 1.13 (s, 6H), 0.95 (t,  $J = 7.4$  Hz, 3H).  $^{13}\text{C}$  NMR (126 MHz,  $\text{CDCl}_3$ )  $\delta$  164.18, 163.58, 159.52, 143.42, 133.07, 131.20, 129.08, 128.22, 125.69, 123.19, 122.23, 114.94, 114.06, 105.61, 67.10, 65.70, 45.53, 39.89, 34.57, 30.13, 22.31, 22.13, 20.29, 18.01, 13.75.  $\text{C}_{25}\text{H}_{30}\text{N}_4\text{O}_3$  ( $M + H$ ) 435.2, found 435.2.

### Preparation and Characterization of Probe DPFP

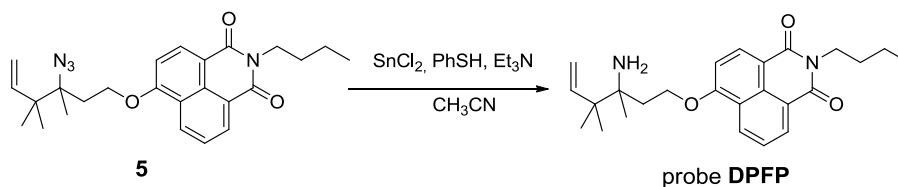

$\text{SnCl}_2$  (0.08 g, 0.35 mM) was added to a round-bottomed flask, then a solution of PhSH (0.1 g, 1 mM) and  $\text{Et}_3\text{N}$  (0.1 g, 1 mM) in MeCN was added and the mixture was stirred for 15 min at room temperature, then compound **5** (0.1 g, 0.23 mM) was added as a solution in MeCN and stirred at room temperature for an additional 12 h. The reaction was concentrated under reduced pressure, Purification by silica chromatography using EtOAc/PE (v/v, 1:3) afforded probe **DPFP** (yield 20%).  $^1\text{H}$  NMR (500 MHz,  $\text{CDCl}_3$ )  $\delta$  8.56 (dd,  $J = 7.3, 1.1$  Hz, 1H), 8.53 – 8.47 (m, 2H), 7.66 (dd,  $J = 8.2, 7.4$  Hz, 1H), 7.06 (d,  $J = 8.3$  Hz, 1H), 6.05 (dd,  $J = 17.5, 10.9$  Hz, 1H), 5.13 (ddd,  $J = 18.8, 14.2, 1.3$  Hz, 2H), 4.47 (dtd,  $J = 17.0, 9.2, 6.3$  Hz, 2H), 4.23 – 4.07 (m, 2H), 2.15 (ddd,  $J = 14.1, 7.8, 6.4$  Hz, 1H), 2.05 (dt,  $J = 13.8, 6.8$  Hz, 1H), 1.73 – 1.68 (m, 4H), 1.50 – 1.39 (m, 2H), 1.18 (s, 3H), 1.12 (s, 6H), 0.98 (t,  $J = 7.4$  Hz, 3H).  $^{13}\text{C}$  NMR (126 MHz,  $\text{CDCl}_3$ )  $\delta$  164.53, 163.96, 160.20, 144.70, 133.47, 131.39, 129.35, 128.54, 125.76, 123.48, 122.44, 114.83, 113.82, 105.96, 66.69, 55.40, 44.21, 40.06, 35.50, 30.26, 22.11, 22.07, 21.77, 20.40, 13.85.  $\text{C}_{25}\text{H}_{32}\text{N}_2\text{O}_3$  ( $M + H$ ) 409.2413, found 409.2492.

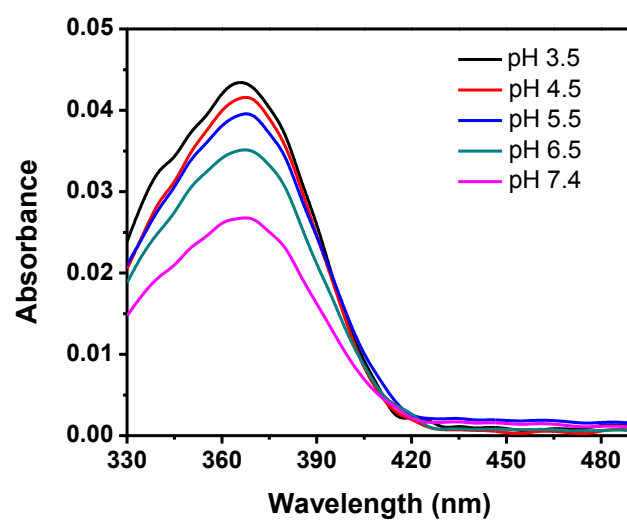

Fig. S1 Absorption spectra of probe DPFP (5  $\mu$ M) only at different pH values.

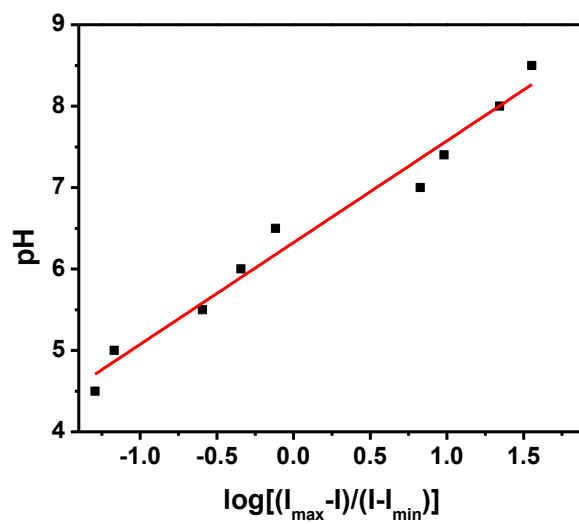

Fig. S2 Plot of pH vs  $\log[(I_{\max}-I)/(I-I_{\min})]$ , where I is the relative fluorescence intensity of probe DPFP. Ex/Em = 365/455 nm.

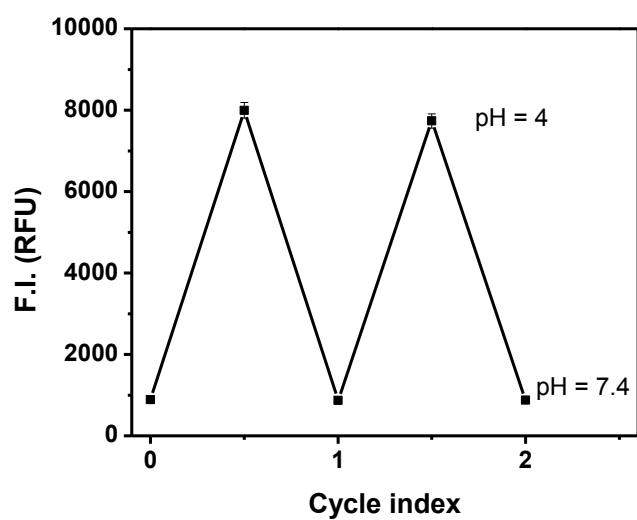

**Fig. S3** Reversible fluorescence (455 nm) changes between pH 4 and pH 7.4. All data were obtained from excitation at 365 nm in PBS buffer (0.5% DMSO, 10 mM) at 37 °C.

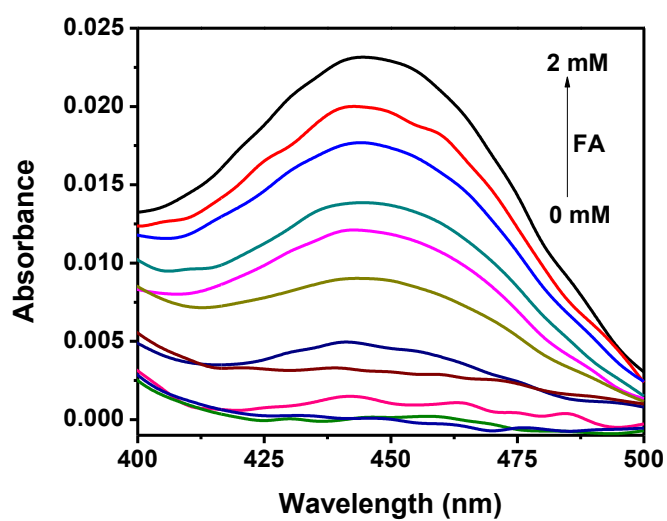

**Fig. S4** Absorption spectra of probe DPFP (5 μM) with FA (0-2 mM) titration.

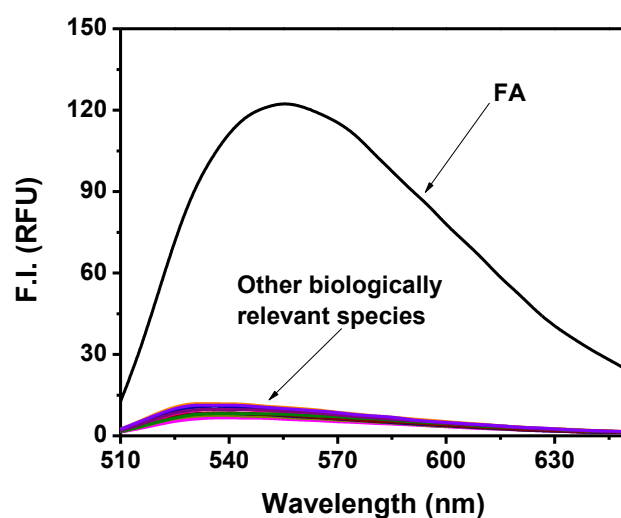

**Fig. S5** Fluorescence spectra of probe **DFPF** (5  $\mu\text{M}$ ) in the presence of FA and other various biologically relevant species in PBS buffer (0.5% DMSO, 10 mM, pH 7.4). Ex/Em = 455/555 nm.

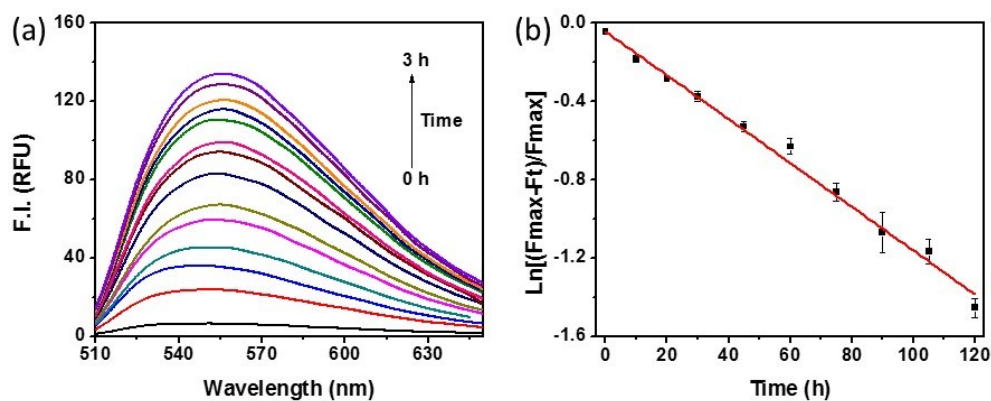

**Fig. S6** (a) Fluorescence spectrum of probe **DFPF** (5  $\mu\text{M}$ ) in the presence of 0.5 mM FA; (b) Pseudo-first-order kinetic plot of the reaction of probe **DFPF** (5  $\mu\text{M}$ ) with 0.5 mM FA. Slope = -0.01. Data were acquired in PBS buffer (0.5% DMSO, 10 mM, pH 7.4) for 3 h at 37  $^{\circ}\text{C}$  at Ex/Em = 455 nm/555 nm.<sup>3</sup>



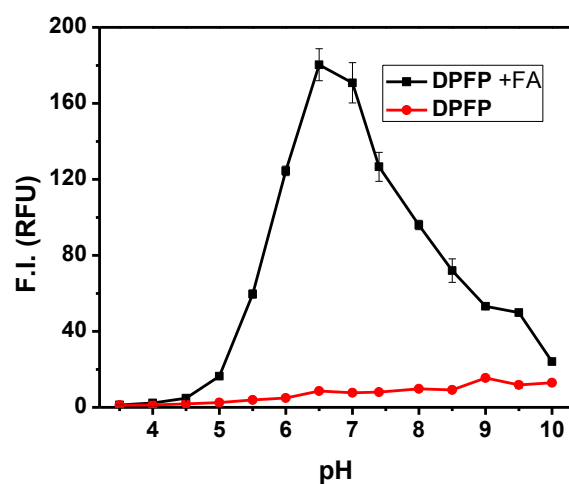

**Fig. S7** pH-Fluorescence profile of probe **DPFP** (5  $\mu$ M) in the absence and in the presence of FA (0.5 mM) in PBS buffer (0.5% DMSO, 10 mM) followed by a 3 h incubation period. Ex/Em = 455/555 nm. Red points represent free probe **DPFP**, black points represent probe **DPFP** with FA.

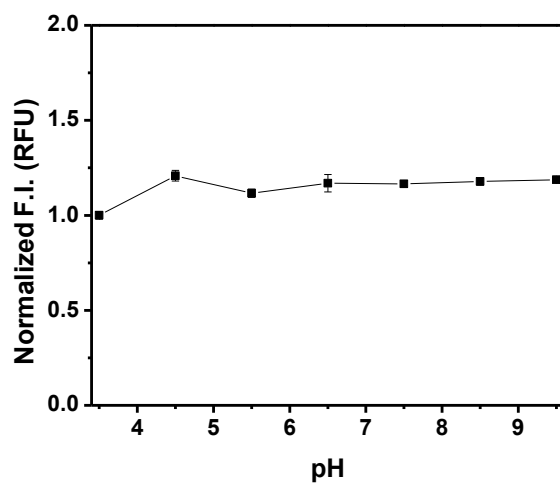

**Fig. S8** pH-fluorescence profile of compound **5** (5  $\mu$ M) in PBS buffer (0.5% DMSO, 10 mM) at different pH values. Ex/Em = 365/455 nm.

(a)

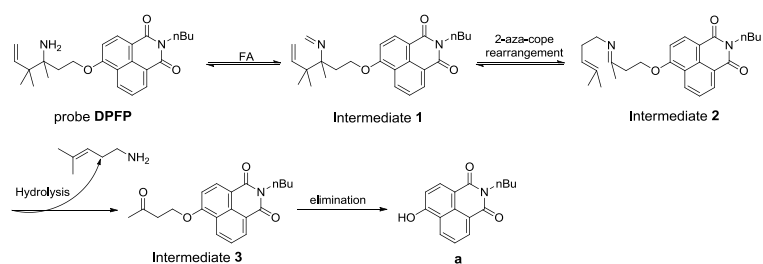

(b)

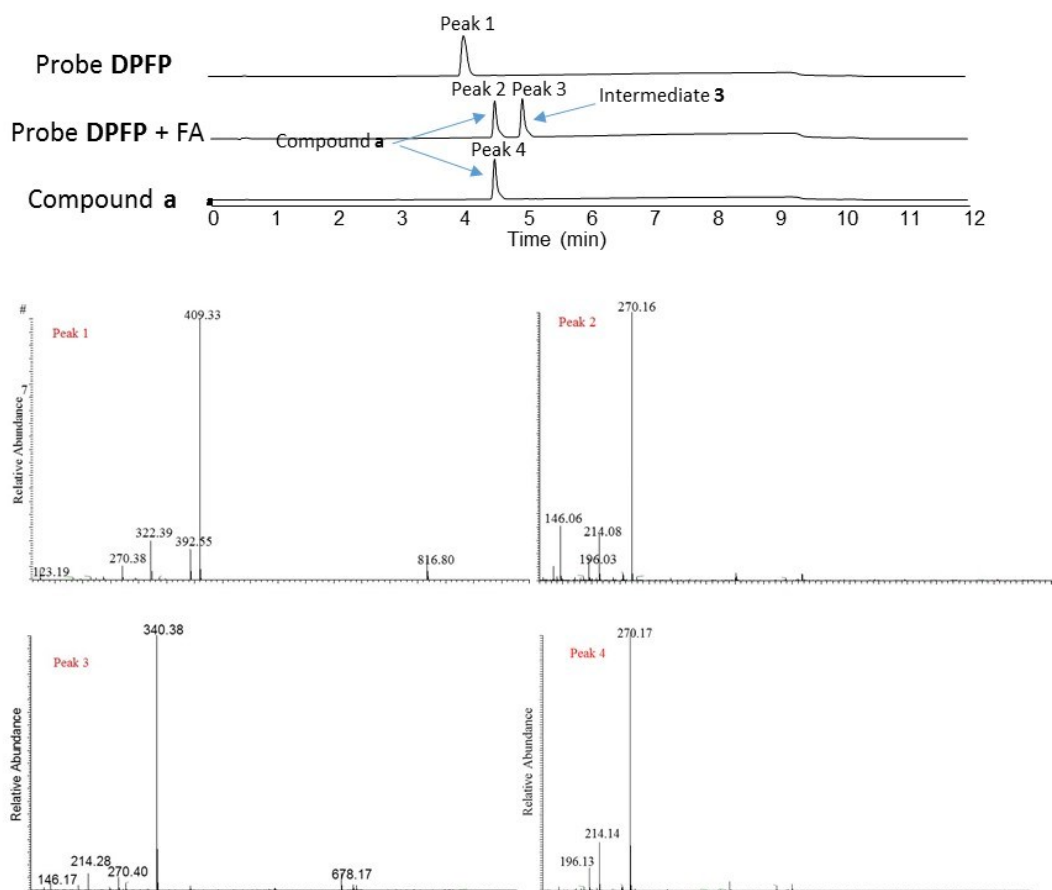

**Fig. S9** (a) The mechanism of Self-Immolative Aza-Cope Strategy and (b) LC-MS data of reaction between probe **DFPF** in the absent and present of FA and compound **a**.

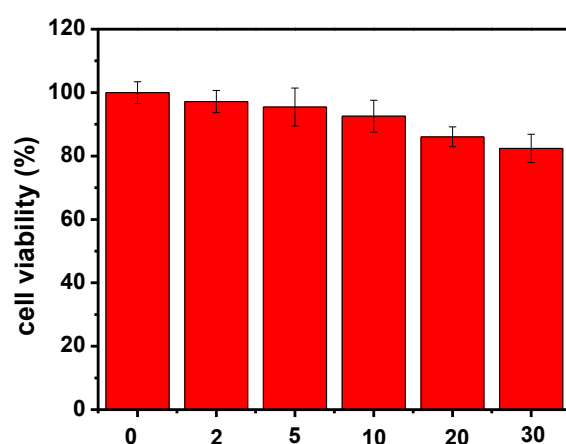

**Fig. S10** MTT assay with different concentrations of probe **DPFP**. HeLa cells were incubated with various concentrations of probe **DPFP** (2, 5, 10, 20 and 30  $\mu\text{M}$ ) for 24 h.

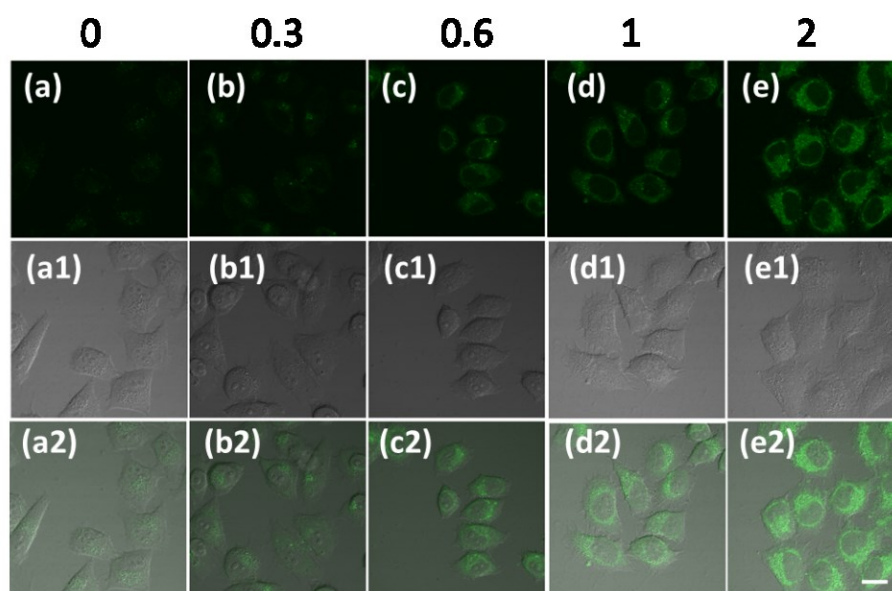

**Fig. S11** Confocal fluorescence imaging of exogenous FA in HeLa cells with probe **DPFP** (10  $\mu\text{M}$ ). Cells were treated with probe **DPFP** in DMEM for 30 min, exchanged into fresh DMEM, and then FA (0.3, 0.6, 1, 2 mM) was added for another 3 h incubation. After that, cells were washed with fresh medium twice for confocal imaging. Excitation was at 488 nm and emissions were collected from 500–550 nm. Scale bar: 20  $\mu\text{m}$ .

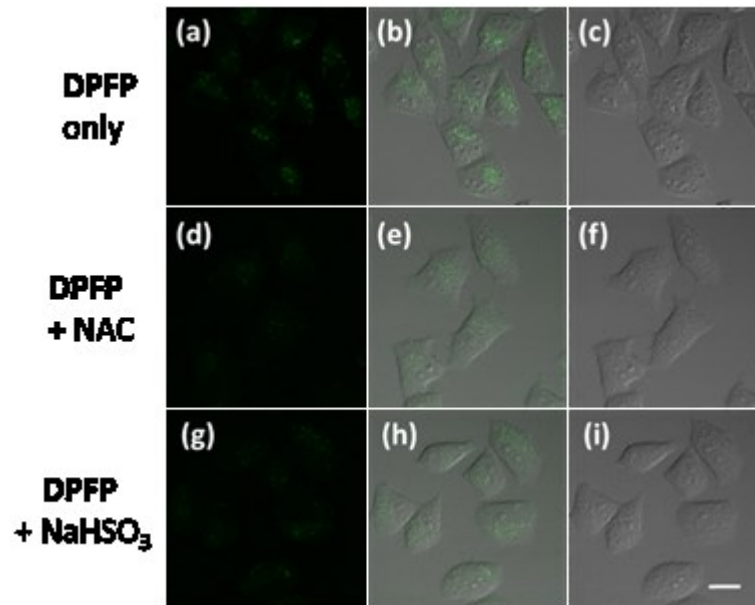

**Fig. S12** Confocal fluorescence imaging of endogenous FA in HeLa cells with probe **DPFP** (10  $\mu$ M). (a) Fluorescent image of HeLa cells stained with probe **DPFP**; (c) Bright-field image of (a); (b) The merged image of (a) and (c); (d) Fluorescent image of HeLa cells stained with NAC (2 mM) and followed by incubation with probe **DPFP**; (f) Bright-field image of (d); (e) The merged image of (d) and (f); (g) Fluorescent image of HeLa cells stained with NaHSO<sub>3</sub> (0.2 mM) and followed by incubation with probe **DPFP**; (i) Bright-field image of (g); (h) The merged image of (g) and (i). Excitation was at 488 nm and emissions were collected from 500–550 nm. Scale bar: 20  $\mu$ m.

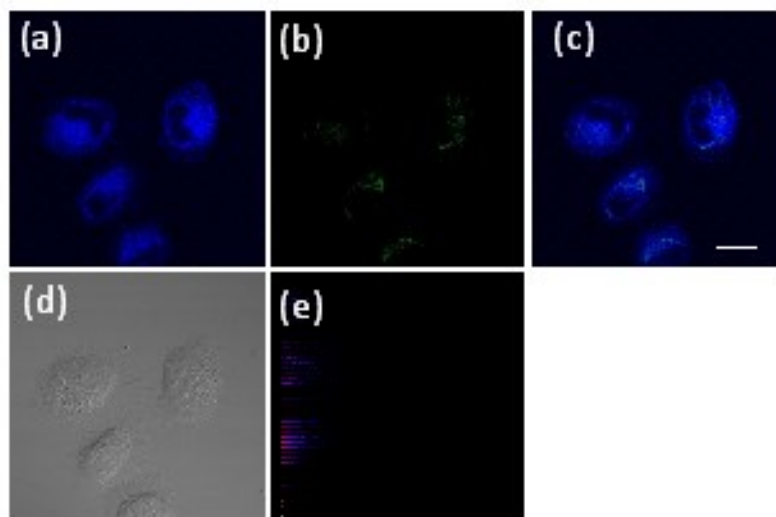

**Fig. S13** Confocal fluorescence imaging of endogenous FA in HeLa cells with probe **DPFP** (10  $\mu$ M). Cells were incubated with probe **DPFP** for 30 min at 37  $^{\circ}$ C and washed with fresh medium. After 3 h, cells were washed with PBS twice for confocal imaging. (a) Blue channel: Ex = 405 nm, collected in the range of 430–480 nm; (b) Green channel: Ex = 488 nm, collected in the range of 500–550 nm; (c) The merged image of (a), (b); (d) Bright field; (e) Intensity scatter plot of blue and green channel. Scale bar: 20  $\mu$ m.

1. K. J. Bruemmer, R. R. Walvoord, T. F. Brewer, G. Burgos-Barragan, N. Wit, L. B. Pontel, K. J. Patel and C. J. Chang, *J. Am. Chem. Soc.*, 2017, **139**, 5338.
2. H. Park, S.-K. Chang, *Dyes Pigm.*, 2015, **122**, 324.
3. Y. Tang, X. Kong, A. Xu, B. Dong and W. Lin, *Angew. Chem., Int. Ed.*, 2016, **55**, 3356.

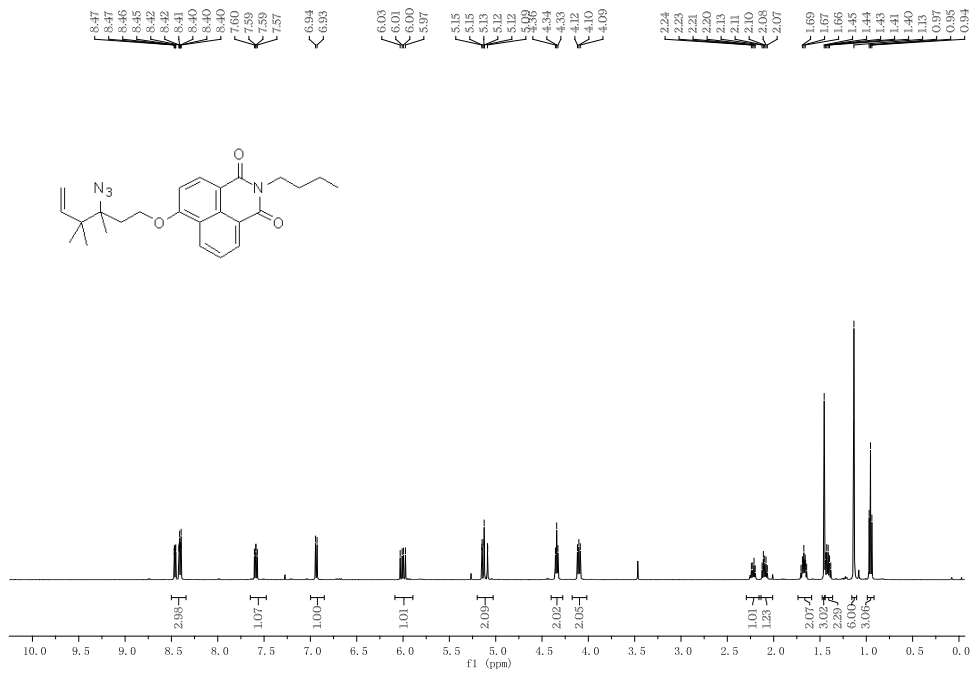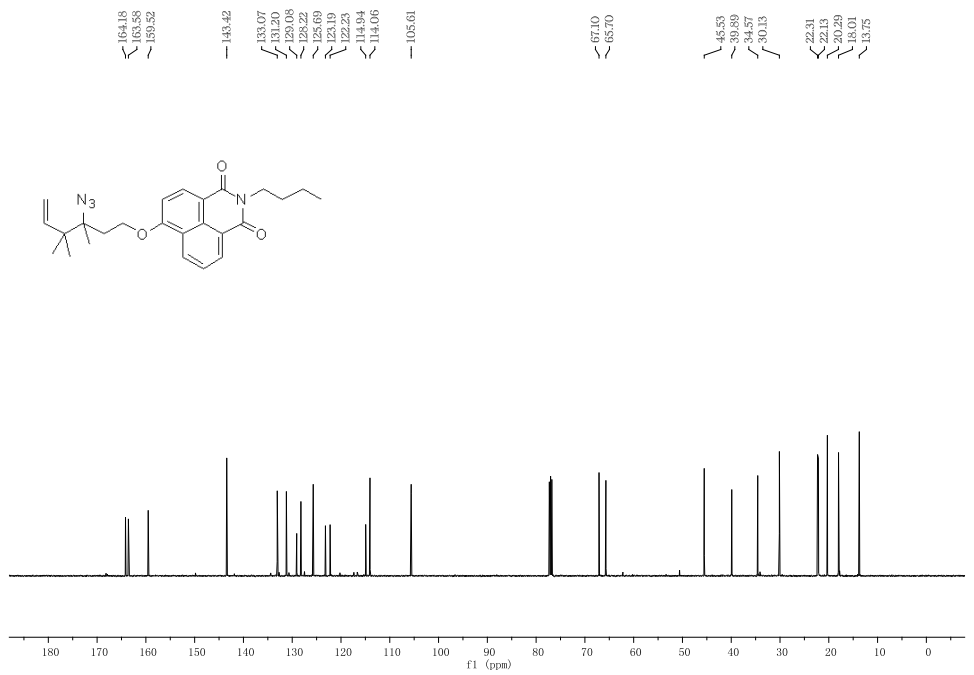

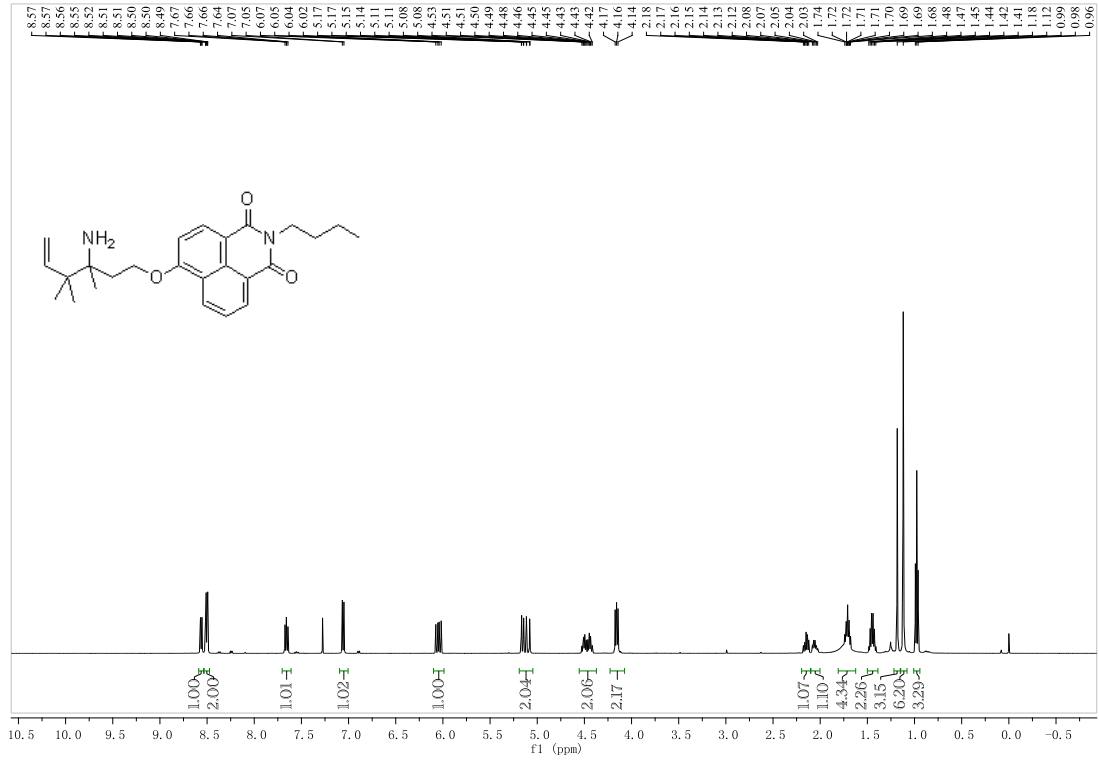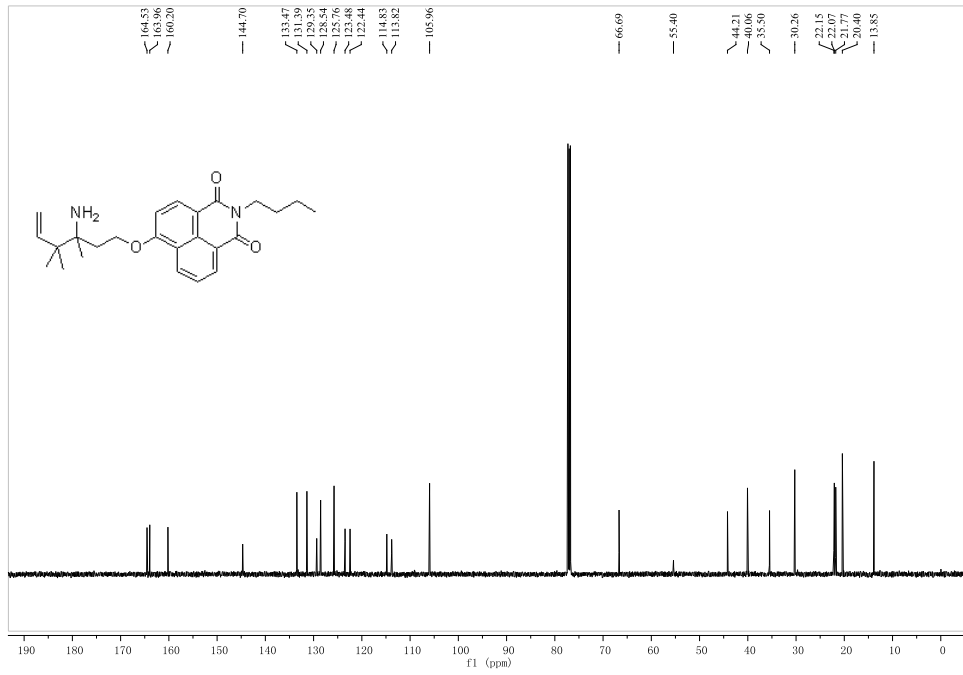

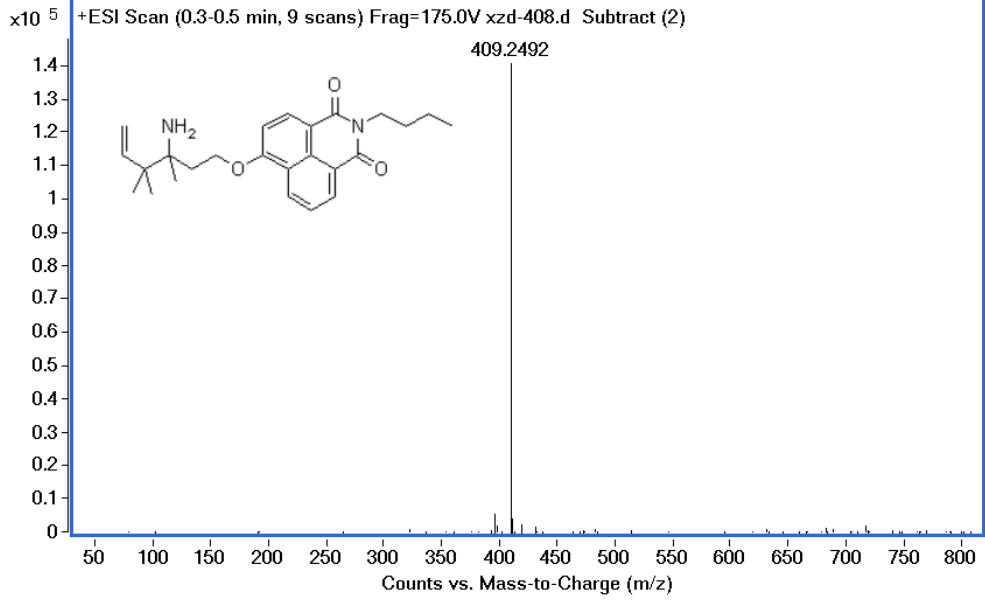

Supplement: c8ob00989a1.pdf [file c8ob00989a1.pdf]
